# Supplementary material
Source: PubMed Central journal article supplement (PMC4936403)
Supplement: NIHMS760261-supplement-supplemental_data.pdf [file NIHMS760261-supplement-supplemental_data.pdf]

## Supplemental data

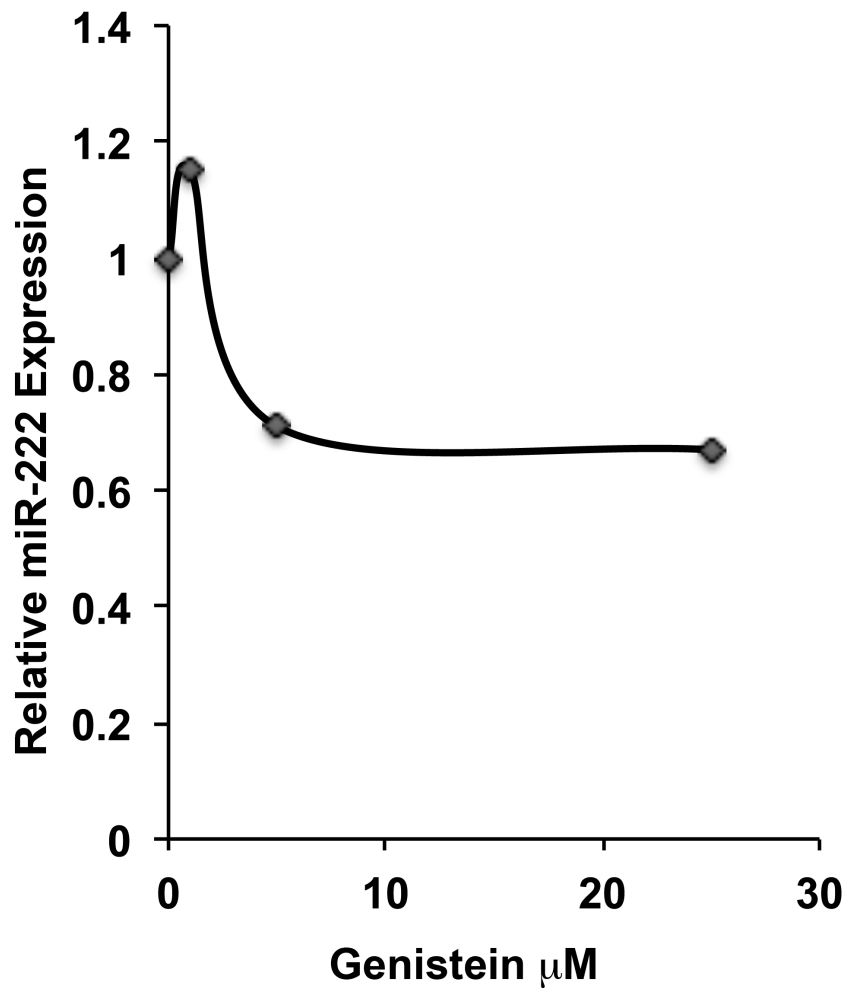

**Figure 1.** Expression of miR-221/222 in response to genistein. Quiescent MDA-MB-435 cells were treated with 0, 5, or 25  $\mu$ M genistein, followed by RT-qPCR for miR-155. The comparative  $C_t$  method was used to calculate the relative abundance of miR-155 with respect to U6 RNA expression. Relative miR-221/222 expression compared to vehicle controls are shown (N=2).

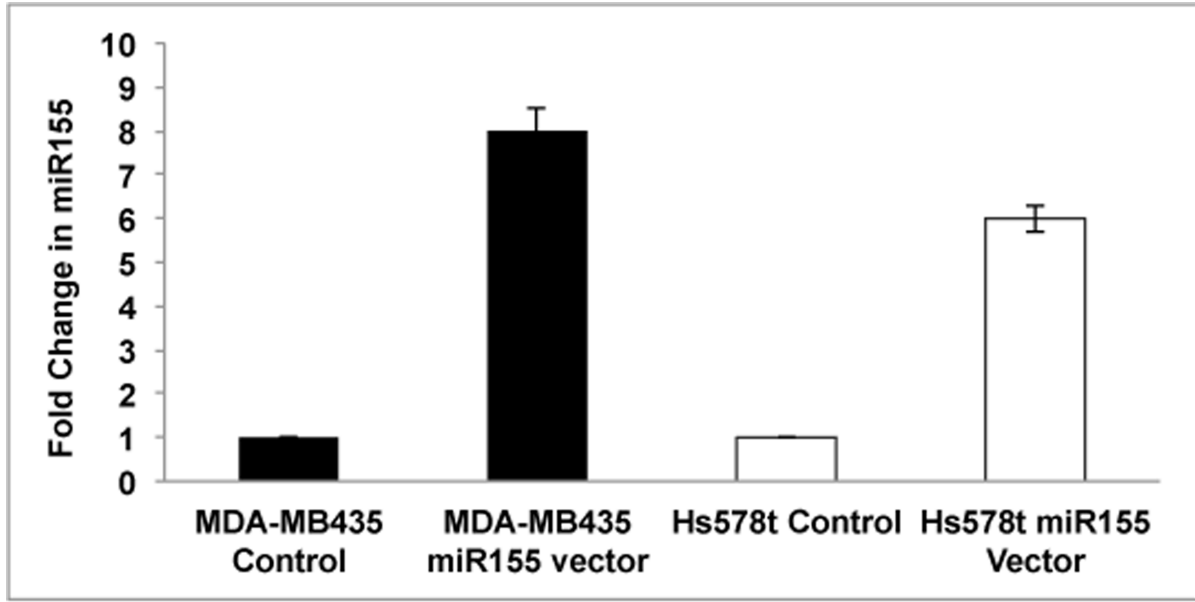

**Figure 2. Ectopic expression of miR-155.** MDA-MB-435 and Hs578t cells were infected with control or miR-155 lentiviral vectors, as per manufacturer's instructions (Biosettia, CA). Stable cell lines were selected by red fluorescence and puromycin resistance. qRT-PCR was performed to determine the fold changes in miR-155 expression in cells expressing miR-155 vectors compared to the control vectors.  $N=3 \pm$  SD.
